# Supplementary material for: Plasma carboxypeptidase B downregulates inflammatory responses in autoimmune arthritis
Source: JCI journal article supplement (doi:10.1172/jci46387), 2011-08-01
Supplement: sd1 [file 1]

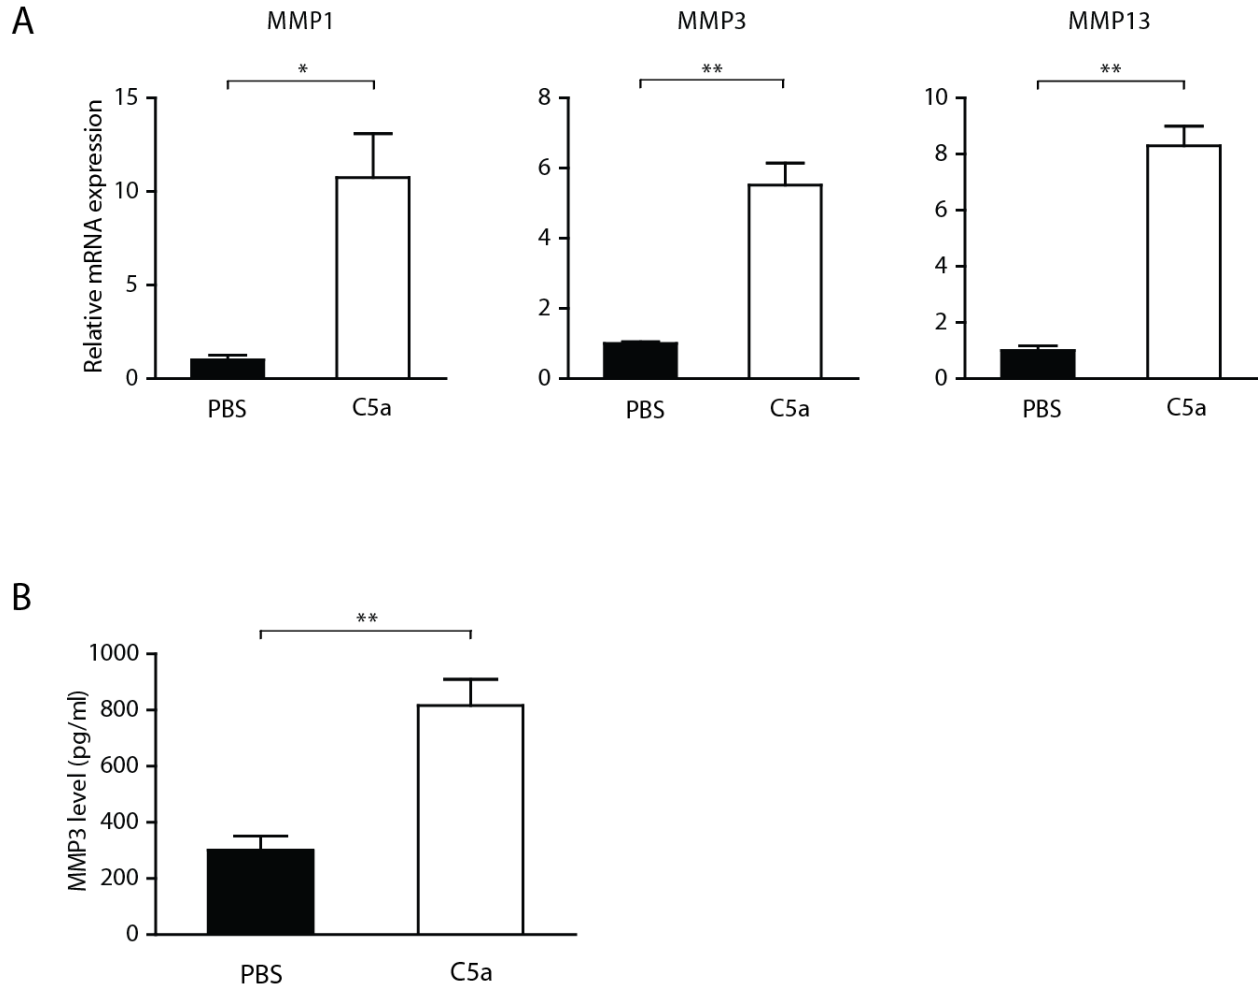

**Supplemental Figure 1 C5a induces RA fibroblast like synoviocytes (FLS) to express MMPs.** FLS were treated with C5a (2.5  $\mu\text{g/ml}$ ), and 24 hours later culture supernatants were collected for ELISA analysis and RNA was isolated for qPCR analysis. (A) qPCR analysis of the expression levels of mRNA encoding MMP1, MMP3, and MMP13. (B) ELISA measurement of MMP3 levels in FLS culture supernatants. Results are the mean  $\pm$  s.e.m of triplicates and are representative 2 independent experiments. (\*\* $P < 0.01$ , \* $P < 0.05$  by Student's t-test).
